# Supplementary material
Source: Springer Nature journal article supplement (https://www.springermedizin.de/resource/supplementary/13048_2009_18_MOESM1_ESM.pdf/9664756)
Supplement: MOESM1 [file 9664756]

**Gn-independent**

**Gn-responsive**

**Gn-dependent**

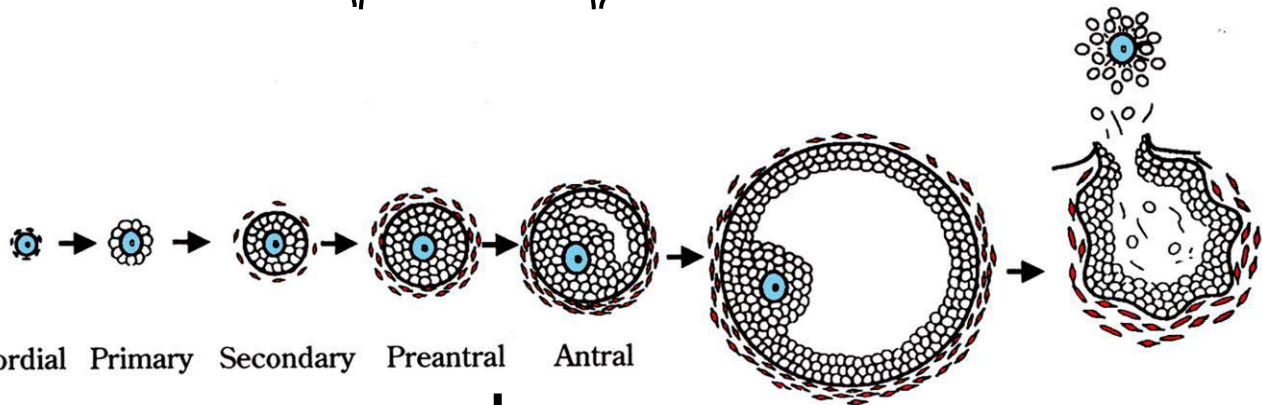

Primordial   Primary   Secondary   Preantral   Antral

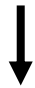

**The preantral-early antral transition**

*Formation of the theca cell layer*  
*Most susceptible to follicular atresia*
